# Supplementary material for: Modulation of Monocyte-Driven Myositis in Alphavirus Infection Reveals a Role for CX3CR1+ Macrophages in Tissue Repair
Source: PubMed Central journal article supplement (PMC7064784; doi:10.1128/mbio.03353-19), 2020-03-03

## CD69<sup>+</sup> T cells

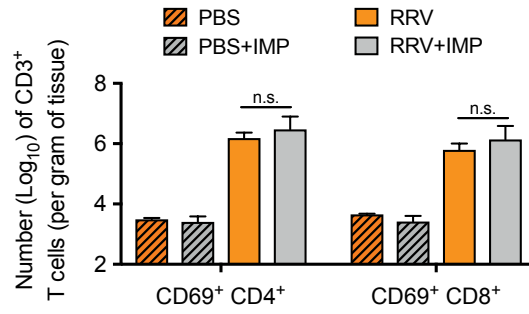

## CCR6<sup>+</sup> T cells

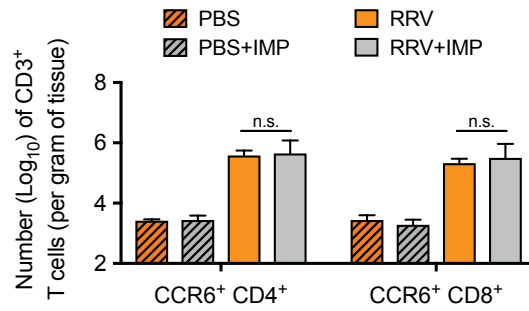

## CD69<sup>+</sup> NK cells

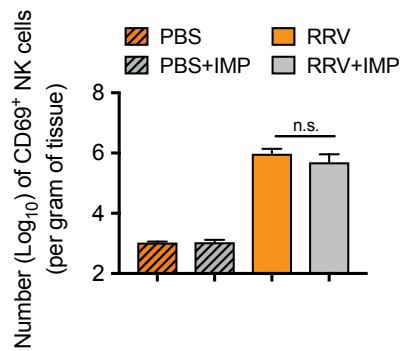

Supplement: mBio.03353-19-sf002.pdf [file mBio.03353-19-sf002.pdf]
