# Supplementary material for: Modulation of Monocyte-Driven Myositis in Alphavirus Infection Reveals a Role for CX3CR1+ Macrophages in Tissue Repair
Source: PubMed Central journal article supplement (PMC7064784; doi:10.1128/mbio.03353-19), 2020-03-03
Supplement: mBio.03353-19-st001.pdf [file mBio.03353-19-st001.pdf]

## Supplementary Table 1

| Target gene   | Forward                 | Reverse                    |
|---------------|-------------------------|----------------------------|
| <i>Mrf4</i>   | GTGGCCAAGTGTTTCGGATC    | AAAGGCGCTGAAGACTGCTG       |
| <i>Myf5</i>   | ACAGCAGCTTTGACAGCATC    | AAGCAATCCAAGCTGGACAC       |
| <i>Myog</i>   | TGAGCATTGTCCAGGCCAG     | GCTTCTCCCTCAGTGTGGCT       |
| <i>Myod1</i>  | CGCTCCAAGTGTCTGATG      | TAGTAGGCGGTGTCGTAGCC       |
| <i>Nos2</i>   | ACATCGACCCGTCCACAGTAT   | CAGAGGGGTAGGCTTGTCTC       |
| <i>Chi3l3</i> | TCACAGGTCTGGCAATTCTTCTG | TTTGTCCTTAGGAGGGCTTCCTC    |
| <i>Timp-1</i> | CCTTGCAAAGTGGAGAGTGACA  | AGGCAAAGTGATCGCTCTGGT      |
| <i>Mmp12</i>  | TTAACCCCAGCACATTTTCGC   | ACTGAATGTTACGTATGTCATCAGCA |
| <i>Mmp9</i>   | CCCAAAGACCTGAAAACCTCC   | TTCTCTCCCATCATCTGGGC       |
| <i>Mmp2</i>   | AGGAGCTCTATGGGCCCTCC    | TCCTGTTTGCAGATCTCCGG       |
| <i>Tgfb1</i>  | CAACGCCATCTATGAGAAAACC  | AAGCCCTGTATTCCGTCTCC       |
| <i>Pax3</i>   | CCAACCATATCCGCCACAA     | TCTTAGAGACGCAACCATGGG      |
| <i>Ccl7</i>   | AATGCATCCACATGCTGCTA    | CTTTGGAGTTGGGGTTTTCA       |
| <i>Colla2</i> | CAGAACATCACCTACCACTGC   | TTCAACATCGTTGGAACCCTG      |

**Supplementary Table 1:** Primer sequences used in qRT-PCR experiments (see Materials and Methods)
